# Supplementary material for: One-pot fabrication of a polydopamine-based nanoplatform for GSH triggered trimodal ROS-amplification for cancer therapy
Source: Royal Society of Chemistry journal article supplement (doi:10.1039/d2bm00421f), 2022-01-01
Supplement: d2bm00421f1.pdf [file d2bm00421f1.pdf]

Supporting Information

**One-Pot Fabrication of Polydopamine-Based Nanoplatform for GSH Triggered  
Trimodal ROS Amplification Cancer Therapy**

*Qinghua Wang, Xinlin Jia, Xianglong Li, Miao He, Jina Hao, Mengjia Guan, Yuanqing Mao\*, Yuanyuan Cao\*, Bin Dai and Yongsheng. Li\**

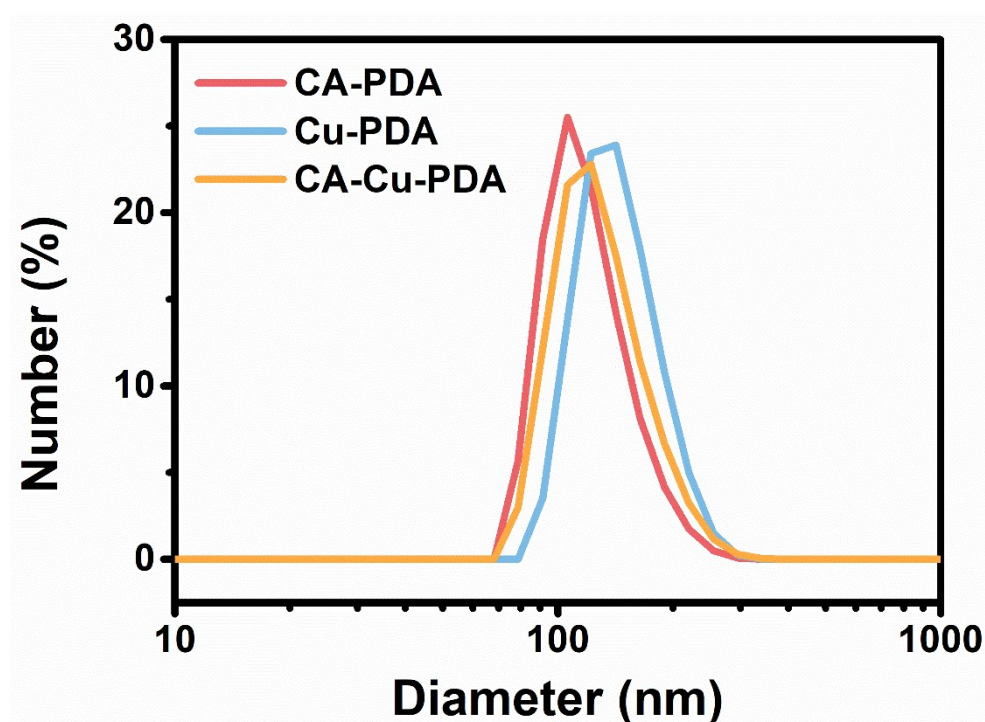

**Figure S1.** The hydrodynamic size distributions of CA-PDA, Cu-PDA and CA-Cu-PDA.

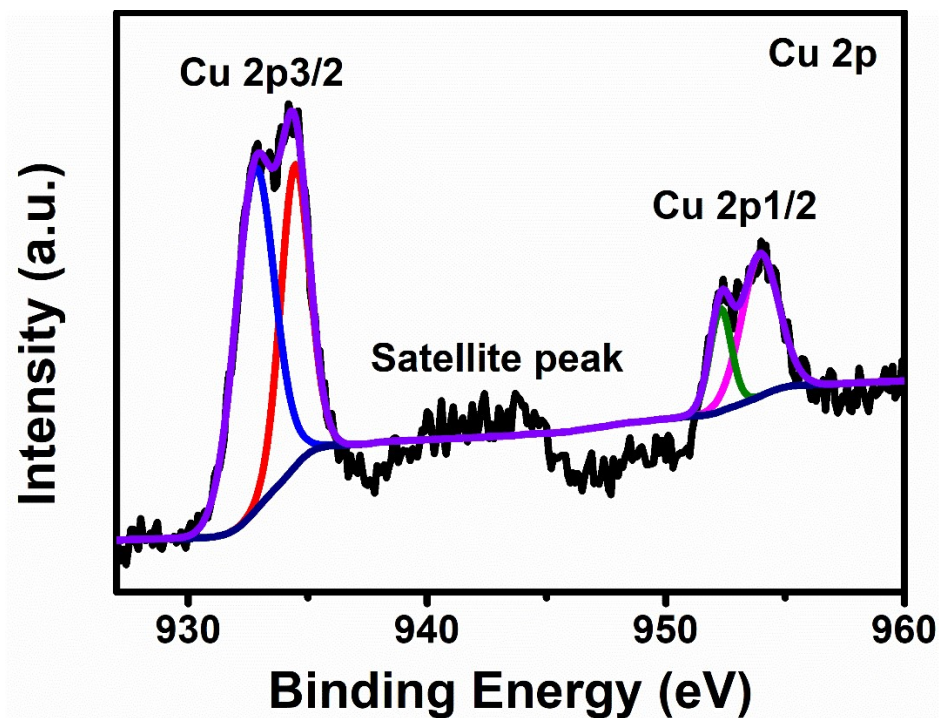

Figure S2. Cu 2p XPS spectra of CA-Cu-PDA.

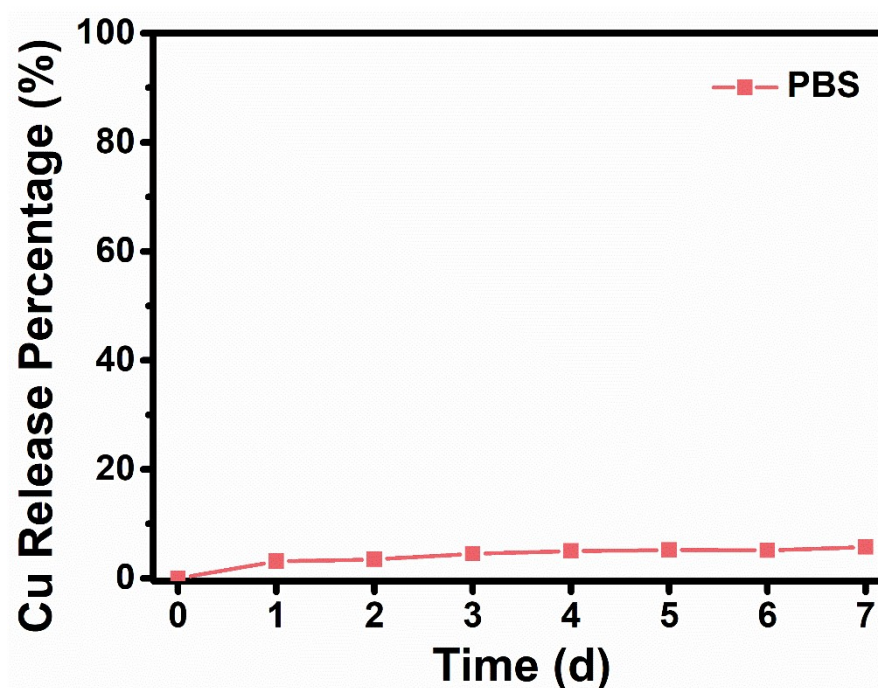

Figure S3. Time-dependent release of copper ions from the CA-CuPDA nanoparticles in PBS solution.

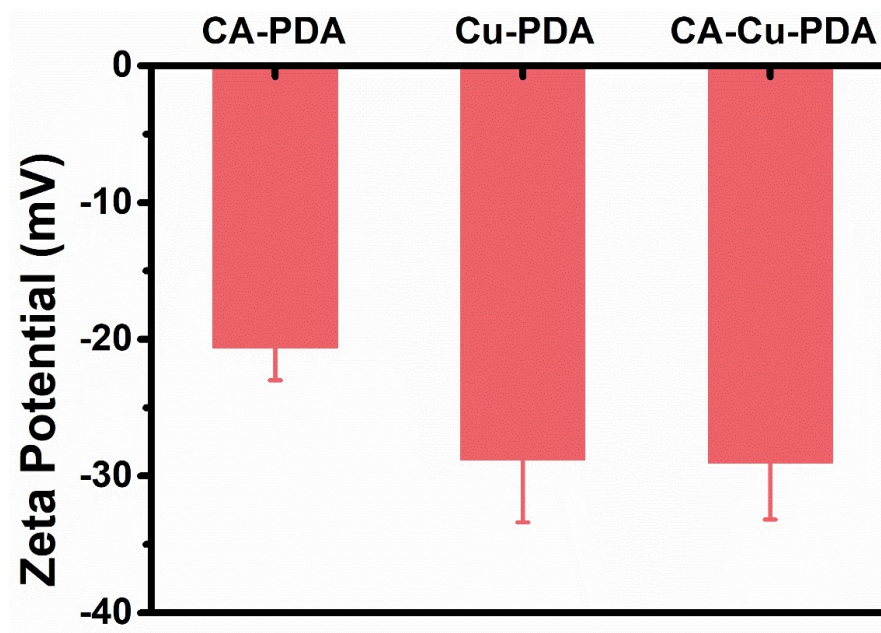

**Figure S4.** Zeta potentials of CA-PDA, Cu-PDA and CA-Cu-PDA.

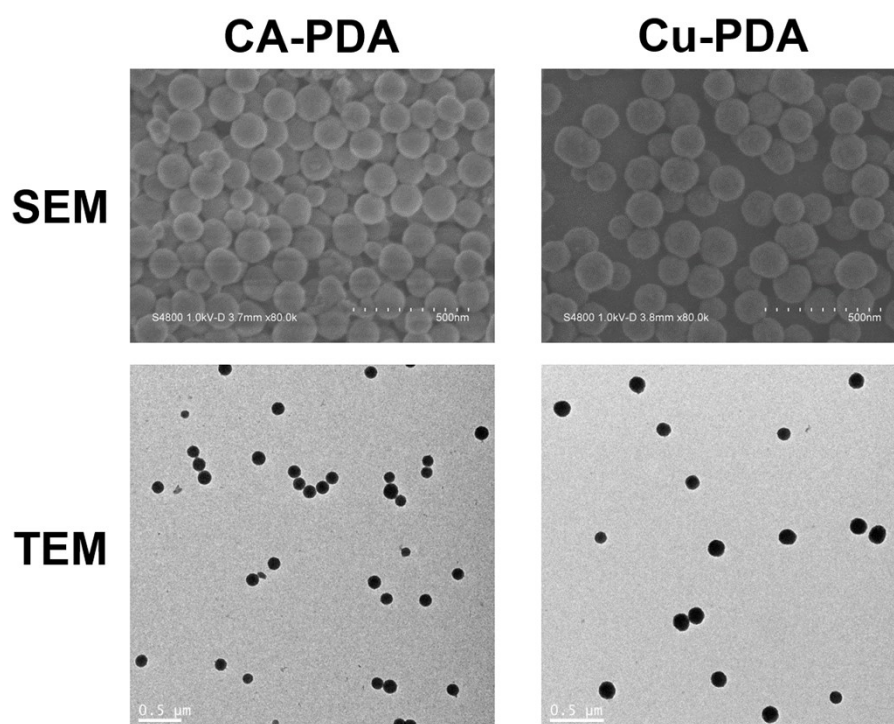

**Figure S5.** SEM and TEM images of CA-PDA and Cu-PDA



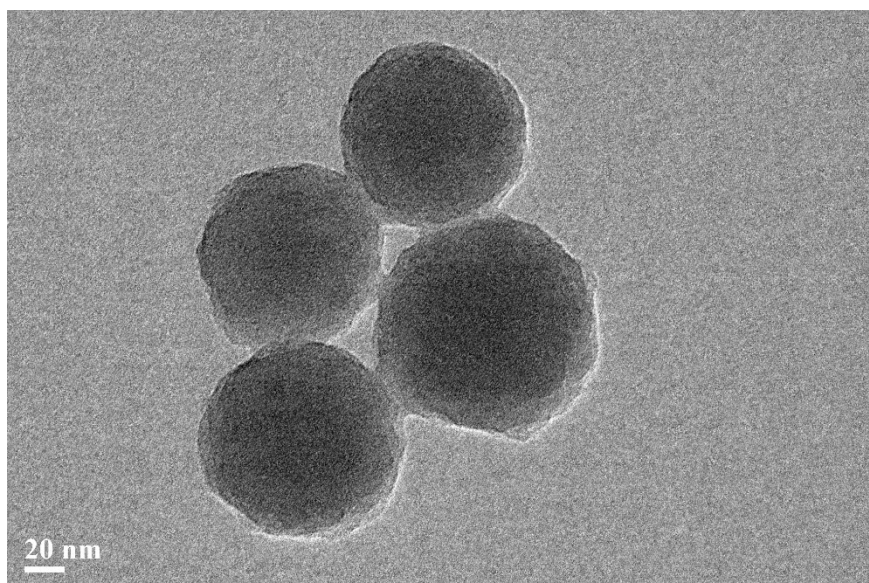

**Figure S6.** TEM image of CA-PDA after GSH treatment (10 mM).

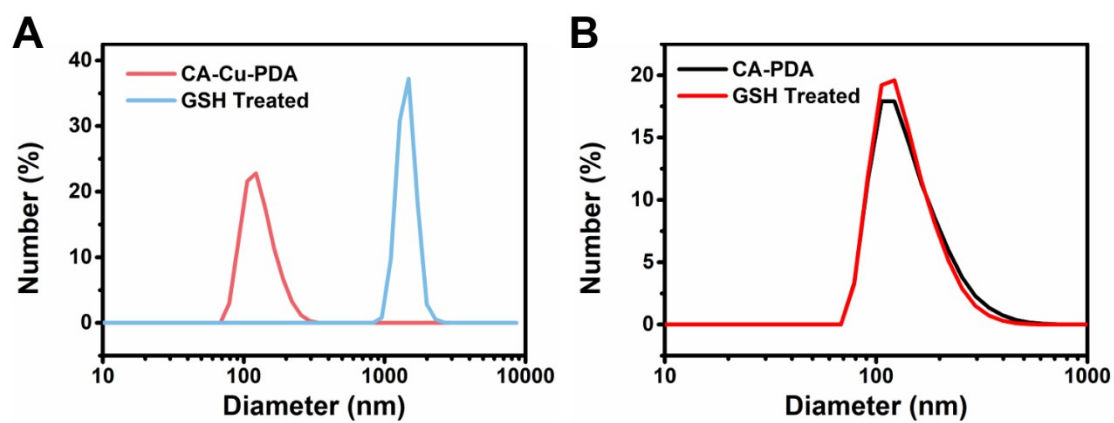

**Figure S7.** Hydrodynamic size distributions of (A) CA-Cu-PDA and (B) CA-PDA before and after GSH (10mM) treatment.

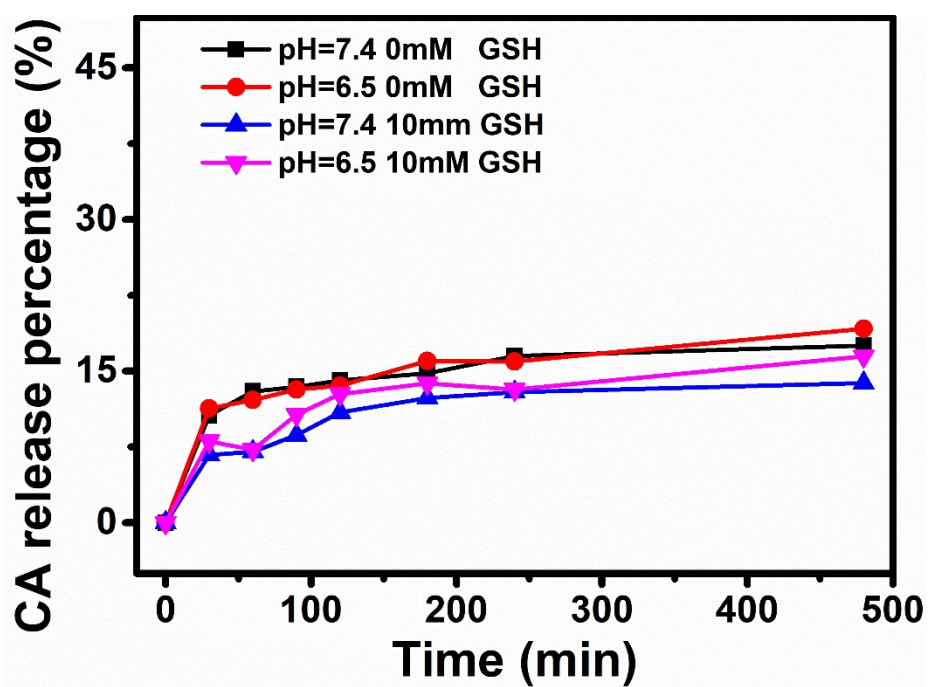

**Figure S8.** Time-dependent release of CA from CA-PDA in the presence of different concentrations of GSH (0 or 10mM) and different pH (6.5 or 7.4).

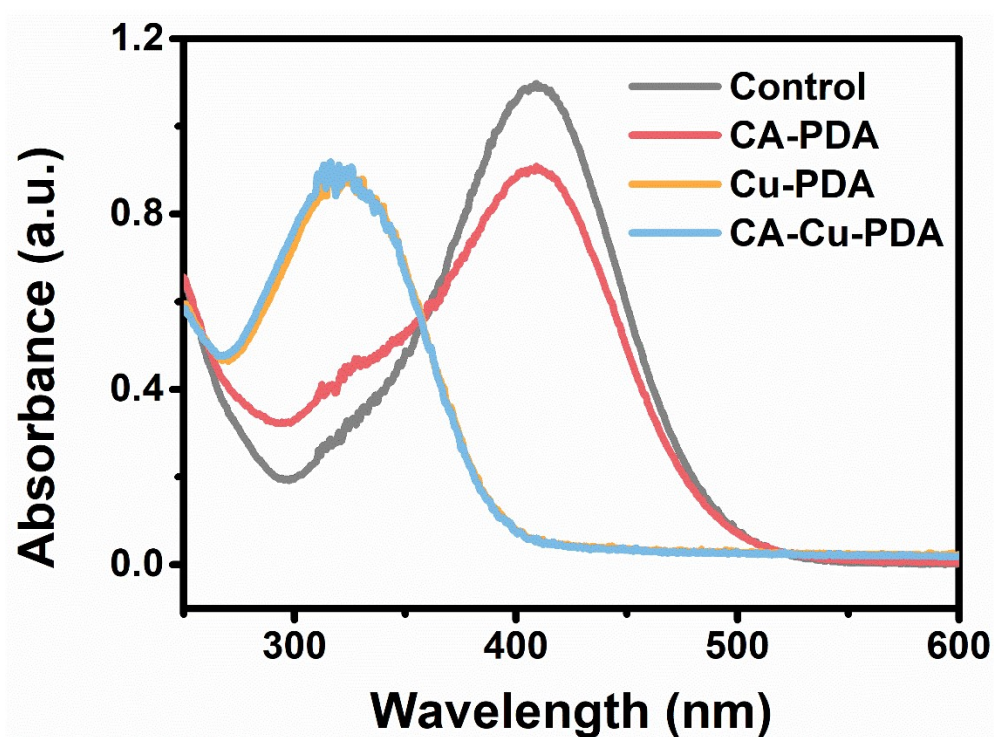

**Figure S9.** UV-Vis spectra of residual GSH content in different groups with DTNB as an indicator.

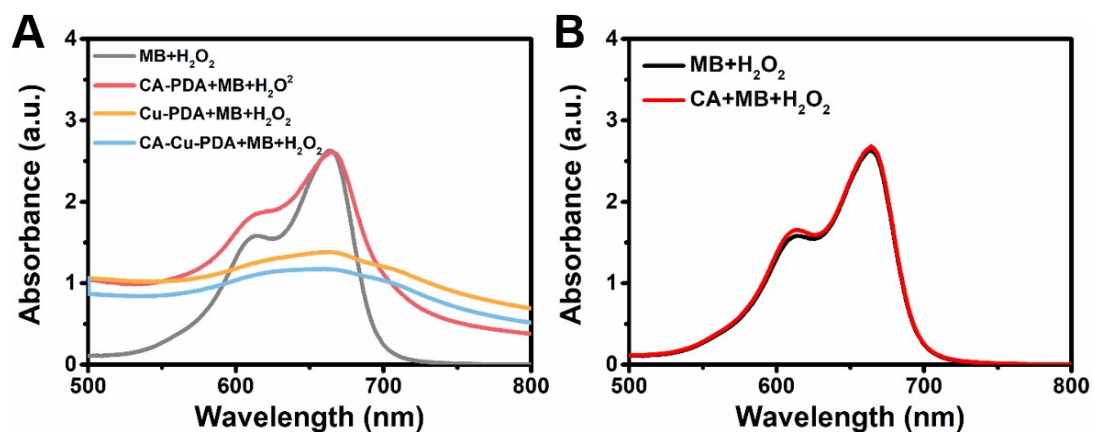

**Figure S10.** (A) UV-Vis spectra of MB degradation in different groups after 180 min.

(B) UV-Vis spectra of MB degradation in the presence or absence of CA.

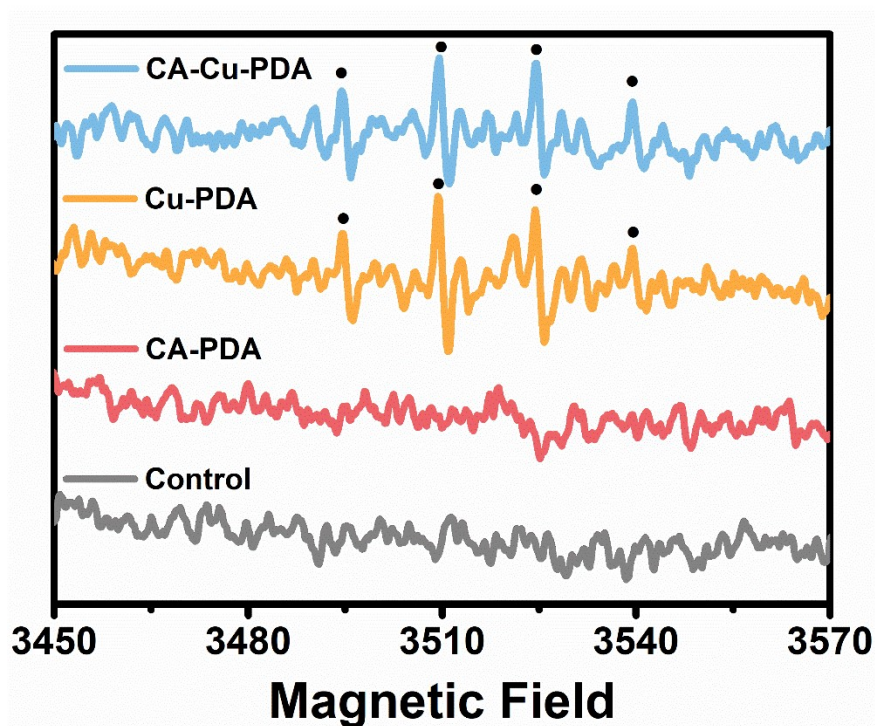

**Figure S11.** ESR spectra of the DMPO solution after treated with different samples and  $\text{H}_2\text{O}_2$ .



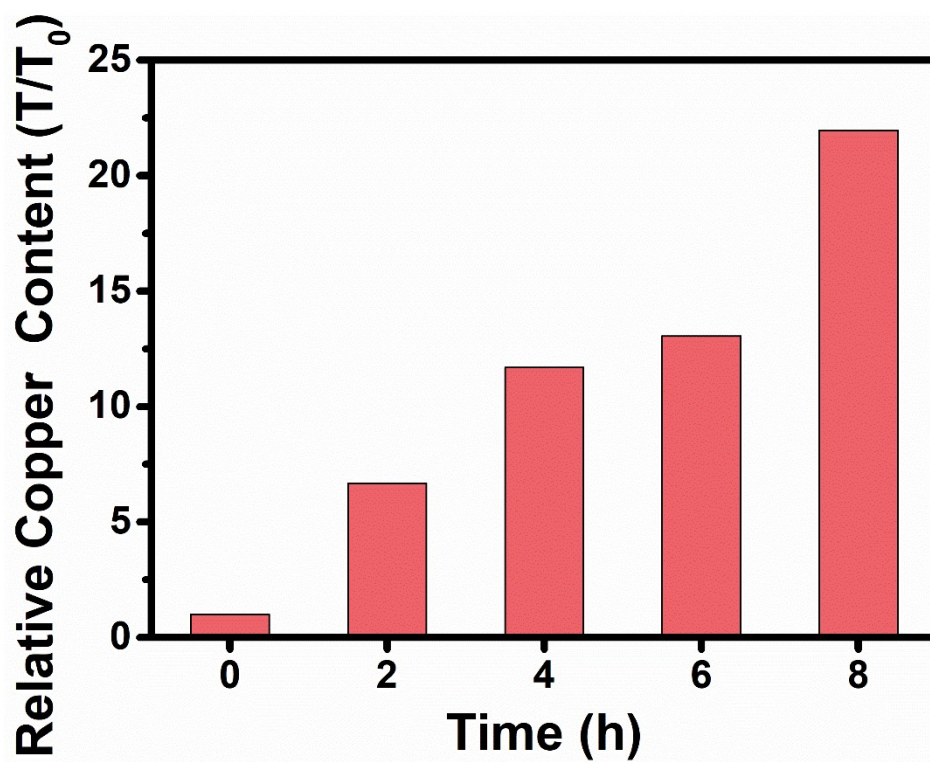

**Figure S12.** The intracellular copper contents of SMMC-7721 cells after incubation with CA-Cu-PDA for different hours.

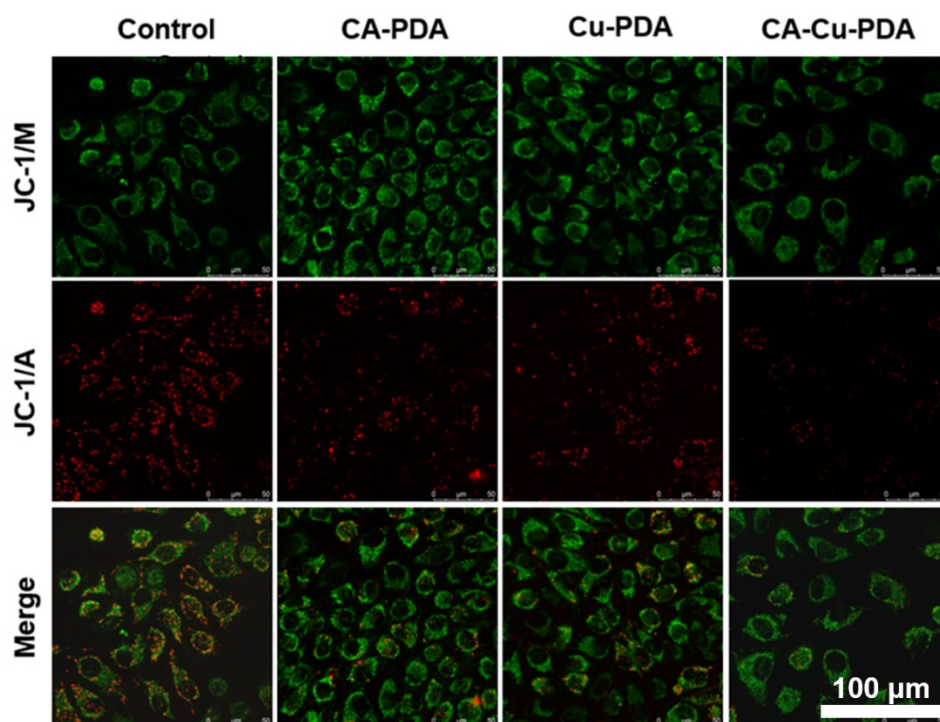

**Figure S13.** Mitochondrial membrane potential of SMMC-7721 cells after 24h of incubation with different samples and indicated by JC-1 staining. The red fluorescence is the monomers of JC-1 and the green fluorescence is the aggregates of JC-1.



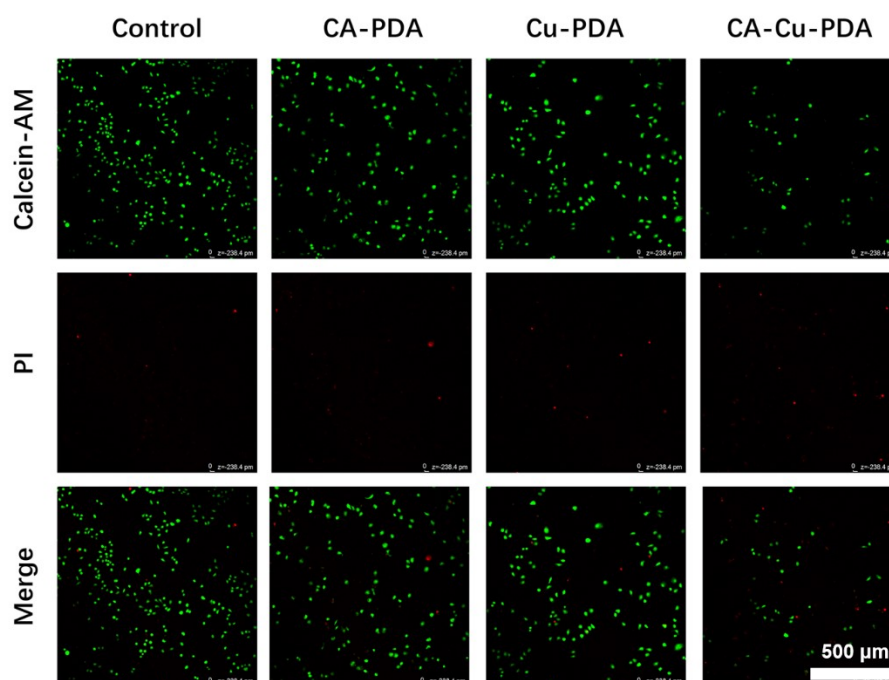

**Figure S14.** Fluorescence images of calcein-AM (green, live cells) and PI (red, dead cells) co-stained SMMC-7721 cells after incubation with different samples for 24h.

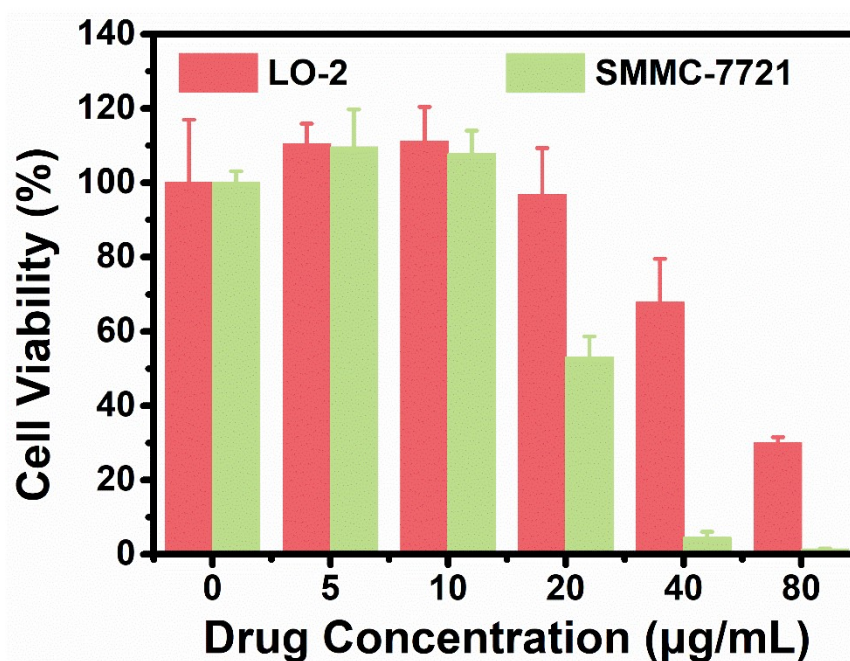

**Figure S15.** Cytotoxicity of CA towards normal cells (LO-2) and cancer cells (SMMC-7721).

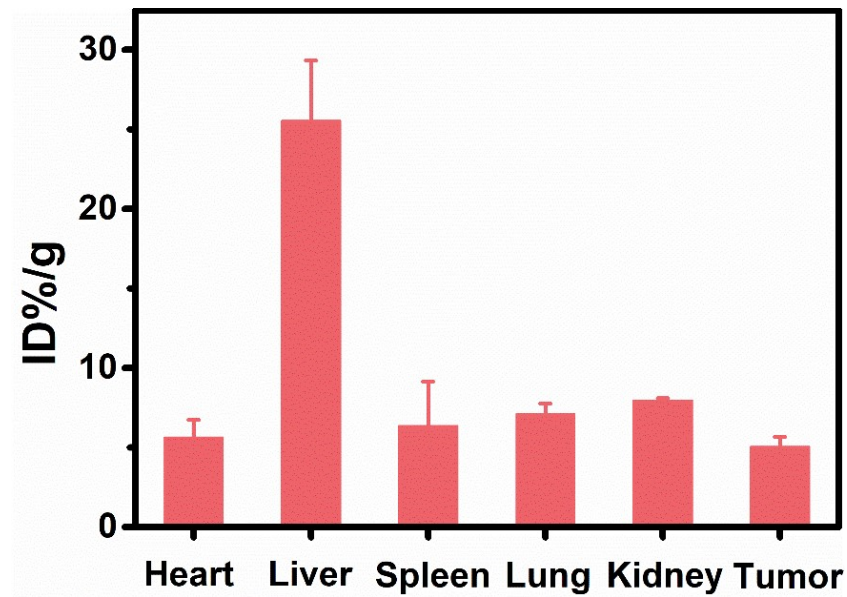

**Figure S16.** Biodistributions of CA-Cu-PDA revealed by the Cu amounts within major organs and tumor after intravenous injection for 8h.

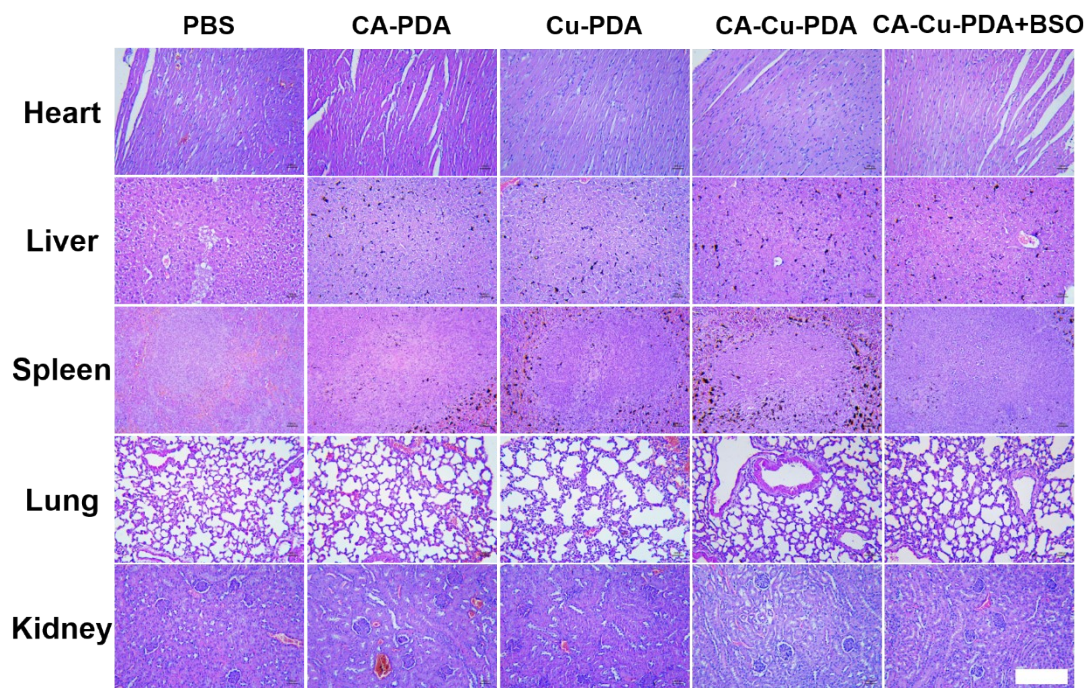

**Figure S17.** H&E staining of major organs in different groups (scale bar = 500  $\mu$ m).
